# Supplementary material
Source: ML conference proceedings conference paper supplement (https://aclanthology.org/D14-1139)
Supplement: Attachment [file D14-1139.Attachment.zip]

# **Weakly-Supervised Learning with Cost-Augmented Contrastive Estimation: *Supplementary Material***

**Kevin Gimpel**      **Mohit Bansal**

Toyota Technological Institute at Chicago, IL 60637, USA

{kgimpel, mbansal}@ttic.edu

## **1 Tag Bigram Costs**

We used treebanks for 11 languages from the CoNLL 2006/2007 shared tasks other than those used in our POS tagging experiments. In particular, we used Arabic, Bulgarian, Catalan, Czech, English, Spanish, German, Hungarian, Italian, Japanese, and Turkish. We replicated shorter treebanks a sufficient number of times until they were a similar size as the largest treebank. Then we counted gold POS tag unigrams and bigrams from the concatenation. In Table 1 we show counts and costs for tag bigrams.

| tag bigram | count | cost   | tag bigram | count | cost  | tag bigram | count  | cost  |
|------------|-------|--------|------------|-------|-------|------------|--------|-------|
| CONJ ⟨EOS⟩ | 5     | 115.23 | CONJ PRT   | 8494  | 40.85 | ADJ VERB   | 38685  | 25.69 |
| DET ⟨EOS⟩  | 20    | 101.36 | CONJ NUM   | 8708  | 40.60 | PRON ADP   | 38982  | 25.61 |
| ADP ⟨EOS⟩  | 30    | 97.31  | NUM ADJ    | 9204  | 40.05 | VERB CONJ  | 39641  | 25.44 |
| DET PRT    | 109   | 84.41  | PRT PRON   | 9349  | 39.89 | . ADV      | 40531  | 25.22 |
| ADV ⟨EOS⟩  | 201   | 78.29  | ADP CONJ   | 9362  | 39.88 | ADV .      | 41062  | 25.09 |
| X DET      | 259   | 75.75  | ADJ DET    | 9385  | 39.85 | ADV ADJ    | 41244  | 25.05 |
| PRT ⟨EOS⟩  | 281   | 74.94  | PRT ADJ    | 9646  | 39.58 | ADJ CONJ   | 44536  | 24.28 |
| PRON ⟨EOS⟩ | 406   | 71.26  | CONJ CONJ  | 9939  | 39.28 | CONJ PRON  | 45286  | 24.11 |
| ADV X      | 486   | 69.46  | ADJ PRT    | 10069 | 39.15 | NOUN DET   | 46804  | 23.78 |
| X PRT      | 506   | 69.06  | ADV NUM    | 10207 | 39.01 | ⟨BOS⟩ CONJ | 48265  | 23.48 |
| DET CONJ   | 518   | 68.82  | ADV PRT    | 10230 | 38.99 | ADP VERB   | 49139  | 23.30 |
| X ADV      | 739   | 65.27  | DET DET    | 10469 | 38.76 | ADJ ADJ    | 51444  | 22.84 |
| PRT X      | 745   | 65.19  | ADV CONJ   | 10739 | 38.50 | ADP ADJ    | 54707  | 22.22 |
| X ⟨EOS⟩    | 747   | 65.16  | PRON PRT   | 10873 | 38.38 | ADP PRON   | 56097  | 21.97 |
| X PRON     | 805   | 64.41  | ⟨BOS⟩ X    | 11226 | 38.06 | CONJ DET   | 57176  | 21.78 |
| NUM X      | 1013  | 62.11  | VERB NUM   | 11281 | 38.01 | . ADP      | 58998  | 21.47 |
| VERB ⟨EOS⟩ | 1023  | 62.02  | PRON CONJ  | 11922 | 37.46 | VERB ADJ   | 59035  | 21.46 |
| CONJ X     | 1037  | 61.88  | NOUN ⟨EOS⟩ | 12334 | 37.12 | NOUN ADV   | 59291  | 21.42 |
| PRON X     | 1141  | 60.92  | ADP ADV    | 12637 | 36.88 | PRT VERB   | 59408  | 21.40 |
| DET X      | 1282  | 59.76  | NOUN X     | 13247 | 36.41 | . PRON     | 59523  | 21.38 |
| NUM ⟨EOS⟩  | 1475  | 58.36  | DET NUM    | 14495 | 35.51 | . DET      | 60663  | 21.19 |
| X VERB     | 1490  | 58.26  | DET PRON   | 14720 | 35.35 | VERB PRON  | 62171  | 20.94 |
| NUM ADV    | 1587  | 57.63  | CONJ .     | 14921 | 35.22 | ⟨BOS⟩ DET  | 62920  | 20.82 |
| X NUM      | 1630  | 57.36  | NUM ADP    | 15024 | 35.15 | NOUN PRT   | 70345  | 19.71 |
| ADJ ⟨EOS⟩  | 1845  | 56.12  | ADJ PRON   | 15396 | 34.90 | . .        | 71475  | 19.55 |
| PRT CONJ   | 1936  | 55.64  | ADP .      | 15595 | 34.77 | VERB ADV   | 76624  | 18.85 |
| NUM PRON   | 1968  | 55.47  | NUM NUM    | 15807 | 34.64 | NUM NOUN   | 78804  | 18.57 |
| PRT ADP    | 2039  | 55.12  | PRON DET   | 16134 | 34.43 | ADV VERB   | 80126  | 18.41 |
| ADJ X      | 2477  | 53.17  | ⟨BOS⟩ ADJ  | 18858 | 32.87 | ⟨BOS⟩ NOUN | 82206  | 18.15 |
| NUM DET    | 2564  | 52.83  | ⟨BOS⟩.     | 18939 | 32.83 | . VERB     | 84367  | 17.89 |
| ADP X      | 2595  | 52.71  | X .        | 18973 | 32.81 | CONJ VERB  | 85420  | 17.77 |
| X ADJ      | 2667  | 52.43  | PRT PRT    | 21393 | 31.61 | PRON NOUN  | 91872  | 17.04 |
| ⟨BOS⟩ PRT  | 2787  | 51.99  | PRON ADV   | 21569 | 31.53 | DET ADJ    | 93111  | 16.91 |
| VERB X     | 2809  | 51.92  | ADV PRON   | 23035 | 30.87 | ADJ ADP    | 104280 | 15.77 |
| ADP PRT    | 2885  | 51.65  | . NUM      | 23833 | 30.53 | NOUN PRON  | 106705 | 15.54 |
| PRT DET    | 3301  | 50.30  | PRT .      | 24106 | 30.42 | . CONJ     | 108929 | 15.34 |
| X CONJ     | 4259  | 47.75  | ADV NOUN   | 25692 | 29.78 | ADJ .      | 109098 | 15.32 |
| DET ADP    | 4276  | 47.71  | ADV DET    | 27526 | 29.09 | CONJ NOUN  | 113019 | 14.97 |
| X ADP      | 4957  | 46.24  | ADV ADV    | 28654 | 28.69 | . NOUN     | 118788 | 14.47 |
| NUM CONJ   | 5078  | 45.99  | NOUN NUM   | 28957 | 28.59 | VERB DET   | 124640 | 13.99 |
| . PRT      | 5782  | 44.70  | NUM .      | 29359 | 28.45 | NOUN CONJ  | 141525 | 12.72 |
| X X        | 5881  | 44.53  | CONJ ADP   | 29523 | 28.39 | VERB ADP   | 150002 | 12.14 |
| NUM PRT    | 5896  | 44.50  | VERB PRT   | 29762 | 28.31 | VERB VERB  | 150999 | 12.07 |
| PRON NUM   | 5944  | 44.42  | ⟨BOS⟩ VERB | 30087 | 28.20 | VERB .     | 153257 | 11.92 |
| ADJ NUM    | 6243  | 43.93  | CONJ ADV   | 30668 | 28.01 | VERB NOUN  | 157745 | 11.63 |
| DET ADV    | 6501  | 43.52  | ADV ADP    | 31008 | 27.90 | PRON VERB  | 164872 | 11.19 |
| NUM VERB   | 6834  | 43.02  | PRON ADJ   | 31259 | 27.82 | ADP DET    | 193443 | 9.59  |
| PRT ADV    | 6841  | 43.01  | CONJ ADJ   | 32453 | 27.45 | NOUN ADJ   | 255720 | 6.80  |
| . X        | 6844  | 43.01  | PRT NOUN   | 32560 | 27.41 | NOUN VERB  | 260172 | 6.63  |
| ADP ADP    | 6954  | 42.85  | ADP NUM    | 32903 | 27.31 | ADJ NOUN   | 293295 | 5.43  |
| ⟨BOS⟩ NUM  | 7079  | 42.67  | PRON PRON  | 33339 | 27.18 | . ⟨EOS⟩    | 367592 | 3.17  |
| DET VERB   | 7390  | 42.24  | ⟨BOS⟩ ADP  | 33470 | 27.14 | NOUN NOUN  | 409828 | 2.09  |
| DET .      | 7413  | 42.21  | ⟨BOS⟩ PRON | 33486 | 27.13 | NOUN ADP   | 427409 | 1.67  |
| PRT NUM    | 7526  | 42.06  | PRON .     | 33567 | 27.11 | DET NOUN   | 454980 | 1.04  |
| X NOUN     | 7870  | 41.61  | . ADJ      | 35337 | 26.59 | ADP NOUN   | 470575 | 0.70  |
| ADJ ADV    | 7932  | 41.53  | ⟨BOS⟩ ADV  | 36636 | 26.23 | NOUN .     | 504897 | 0.00  |

Table 1: Counts and costs for universal tag bigrams based on treebanks for 11 languages not used in experiments. The cost used for unseen bigrams is the maximum of all costs in the table.
